# Supplementary material for: metagene Profiles Analyses Reveal Regulatory Element’s Factor-Specific Recruitment Patterns
Source: PubMed Central journal article supplement (PMC4990179; doi:10.1371/journal.pcbi.1004751), 2016-08-18

# S1 Fig. Imetagene interactive heatmap representation

## Imetagene

This application enables to use interactively the metagene package. This R package produces Metagene-like plots to compare the behavior of DNA-interacting proteins at selected groups of features.

Imetagene INPUTS DESIGN MATRIX PLOT

In order to represent the genomic coverages in a metagene plot, the coverages must be converted in matrix format. Regions are binned to reduce computation time for the following steps. During this step, the noise can be removed using one or more controls and the coverages can be normalized to allow comparison of multiple experiments.

### Current matrix subset

Here is a subset of the matrix contained in the current metagene if any.

```
Regions : list1, list2  
Experiments for list1 : Exp1, Exp2  
Experiments for list2 : Exp1, Exp2
```

### Select an experiment to see its matrix

list1 Exp1

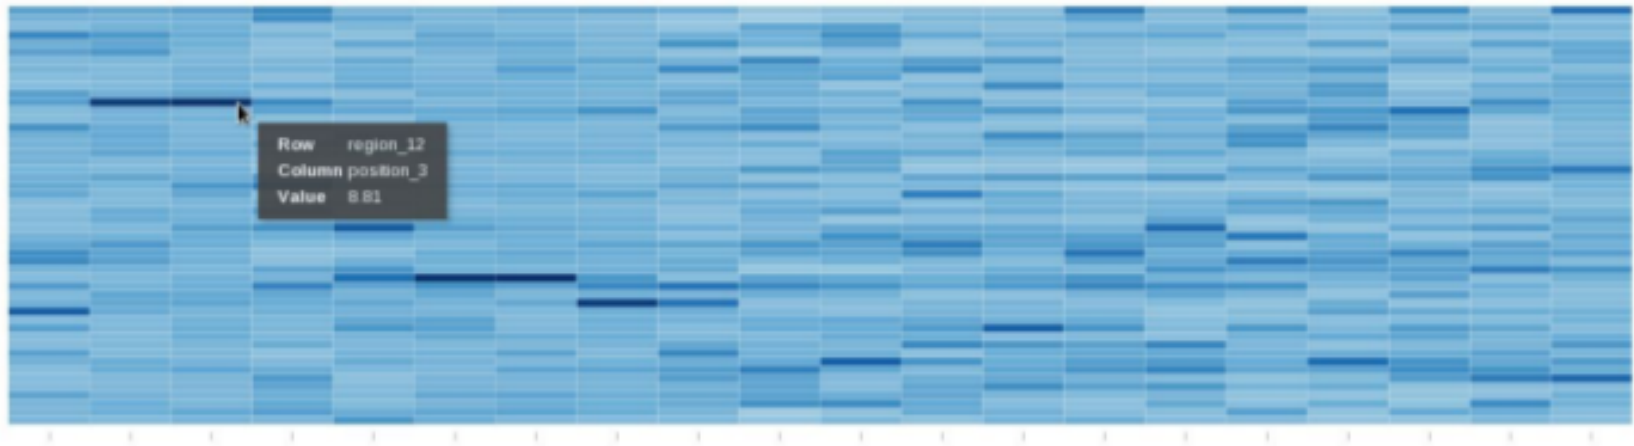

Supplement: pcbi.1004751.s001.pdf [file pcbi.1004751.s001.pdf]
