# Supplementary material for: metagene Profiles Analyses Reveal Regulatory Element’s Factor-Specific Recruitment Patterns
Source: PubMed Central journal article supplement (PMC4990179; doi:10.1371/journal.pcbi.1004751), 2016-08-18

**S4 Fig. Metagene plots of the general transcription factor TBP at promoters and enhancers**

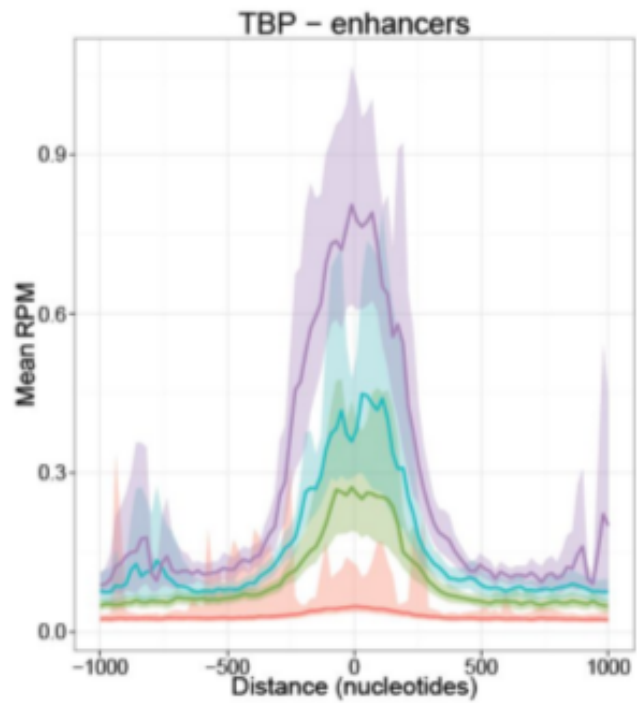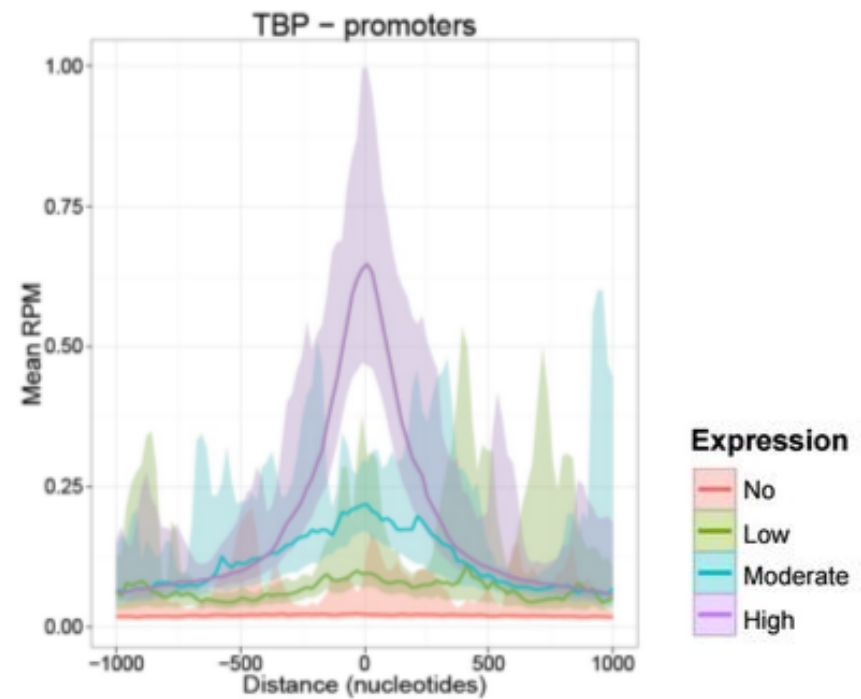

Supplement: pcbi.1004751.s004.pdf [file pcbi.1004751.s004.pdf]
