# Supplementary material for: metagene Profiles Analyses Reveal Regulatory Element’s Factor-Specific Recruitment Patterns
Source: PubMed Central journal article supplement (PMC4990179; doi:10.1371/journal.pcbi.1004751), 2016-08-18

**S6 Fig. Boxplot of RATION\_INTERSECT values for 105 experiments in GM12878**

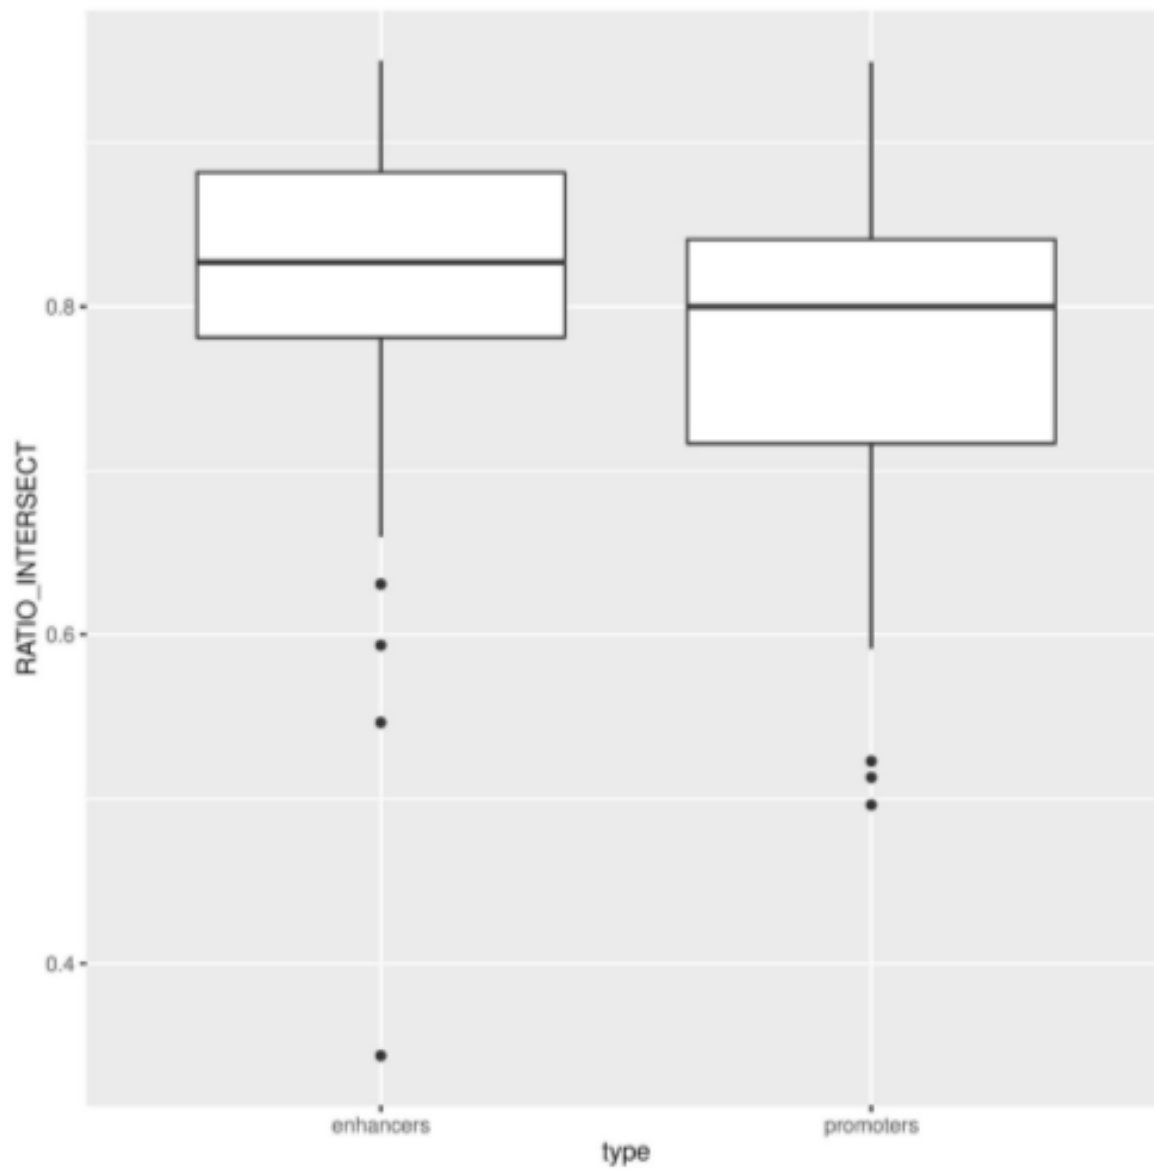

Supplement: pcbi.1004751.s006.pdf [file pcbi.1004751.s006.pdf]
