# Supplementary material for: metagene Profiles Analyses Reveal Regulatory Element’s Factor-Specific Recruitment Patterns
Source: PubMed Central journal article supplement (PMC4990179; doi:10.1371/journal.pcbi.1004751), 2016-08-18

S7 Fig. Metagene plots of the cofactor SMC3 at promoters and enhancers

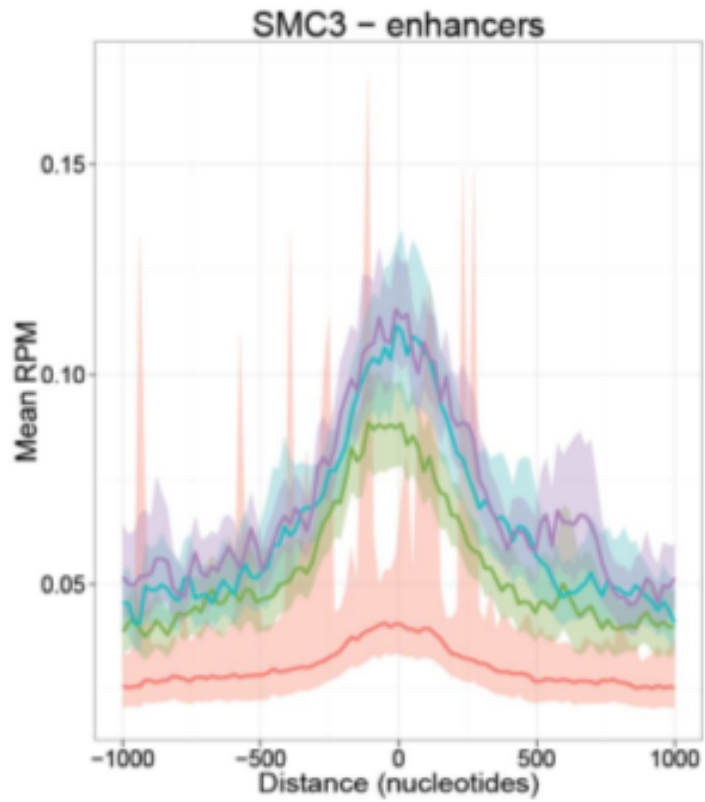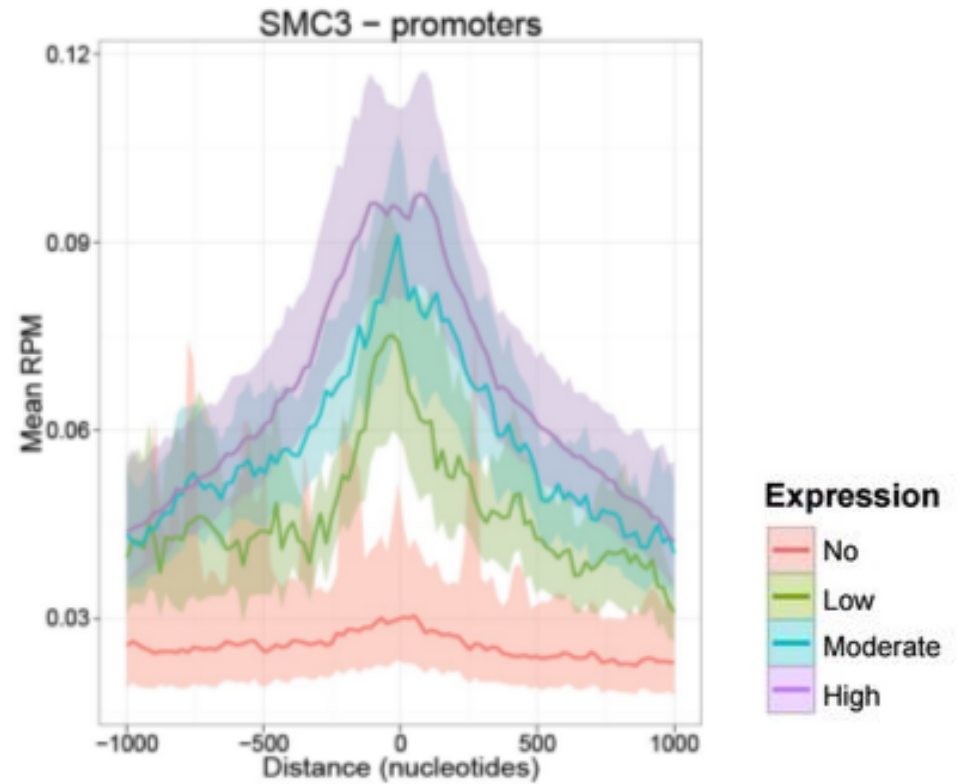

Supplement: pcbi.1004751.s007.pdf [file pcbi.1004751.s007.pdf]
